# Supplementary material for: Radiotherapy plus androgen deprivation therapy for prostate‐specific antigen persistence in lymph node–positive prostate cancer
Source: PubMed Central journal article supplement — Cancer Sci. 2022 May 17;113(7):2386–96. doi: 10.1111/cas.15383 (PMC9277249; doi:10.1111/cas.15383), 2022-05-17
Supplement: CAS-113-2386-s002.pdf [file CAS-113-2386-s002.pdf]

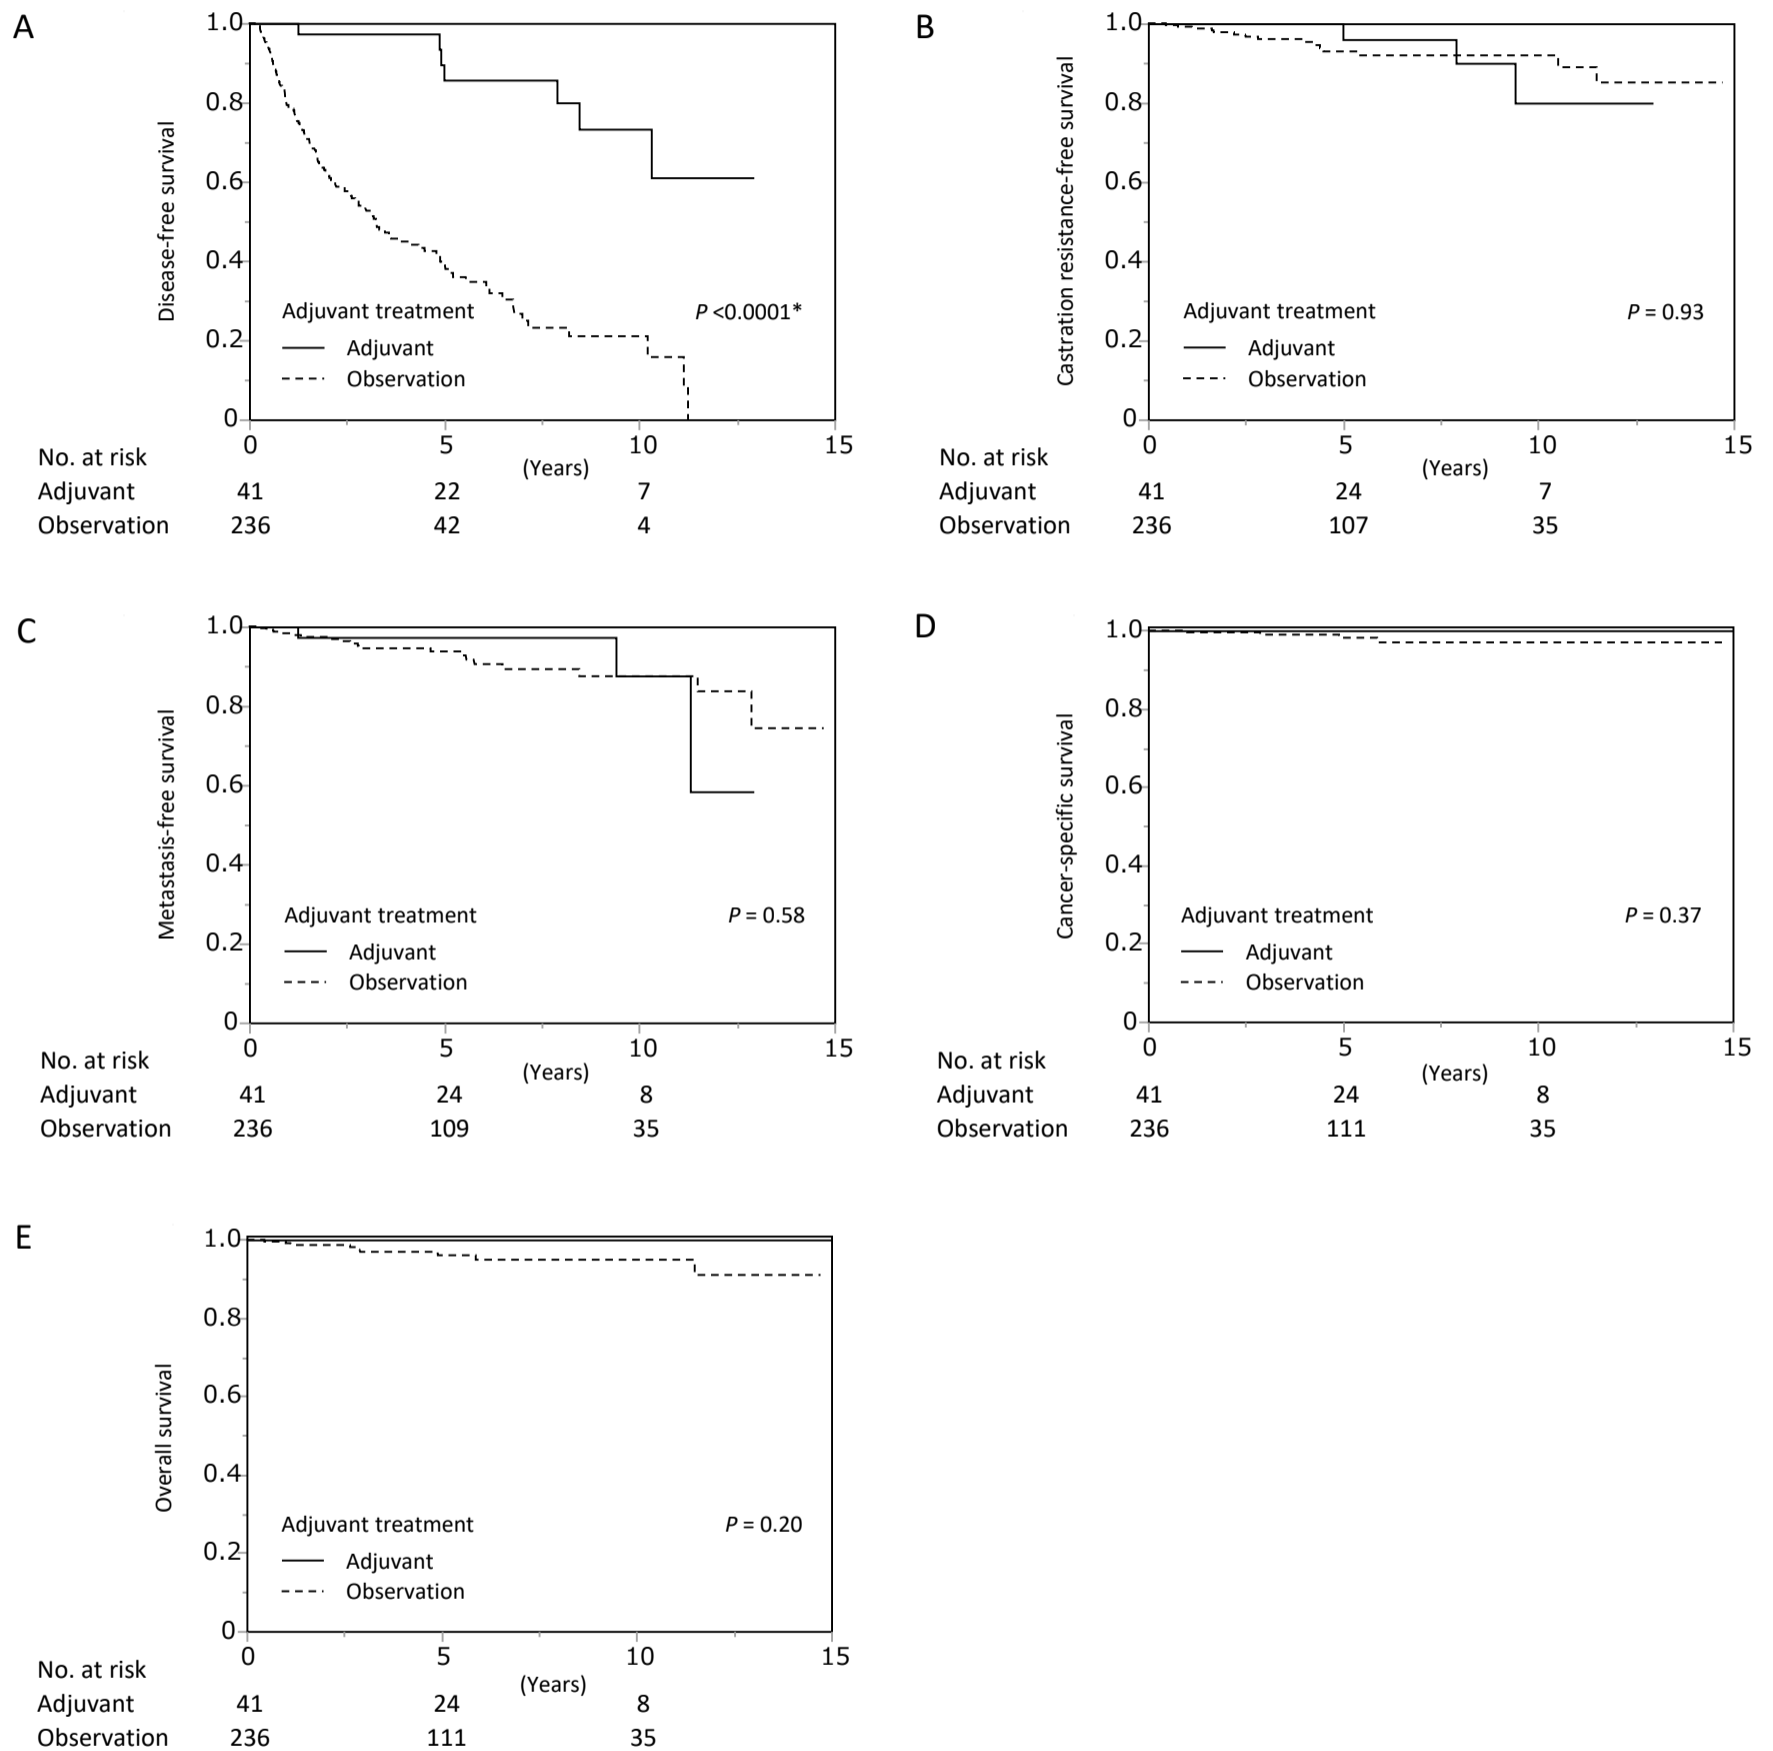

Supplementary Figure 3. Kaplan–Meier analysis of prognosis among patients without prostate-specific antigen (PSA) persistence. (A) Disease-free survival, (B) castration resistance-free survival, (C) metastasis-free survival, (D) cancer-specific survival, and (E) overall survival stratified by adjuvant treatment for patients without PSA persistence.
