# Supplementary material for: Radiotherapy plus androgen deprivation therapy for prostate‐specific antigen persistence in lymph node–positive prostate cancer
Source: PubMed Central journal article supplement — Cancer Sci. 2022 May 17;113(7):2386–96. doi: 10.1111/cas.15383 (PMC9277249; doi:10.1111/cas.15383), 2022-05-17
Supplement: CAS-113-2386-s005.pdf [file CAS-113-2386-s005.pdf]

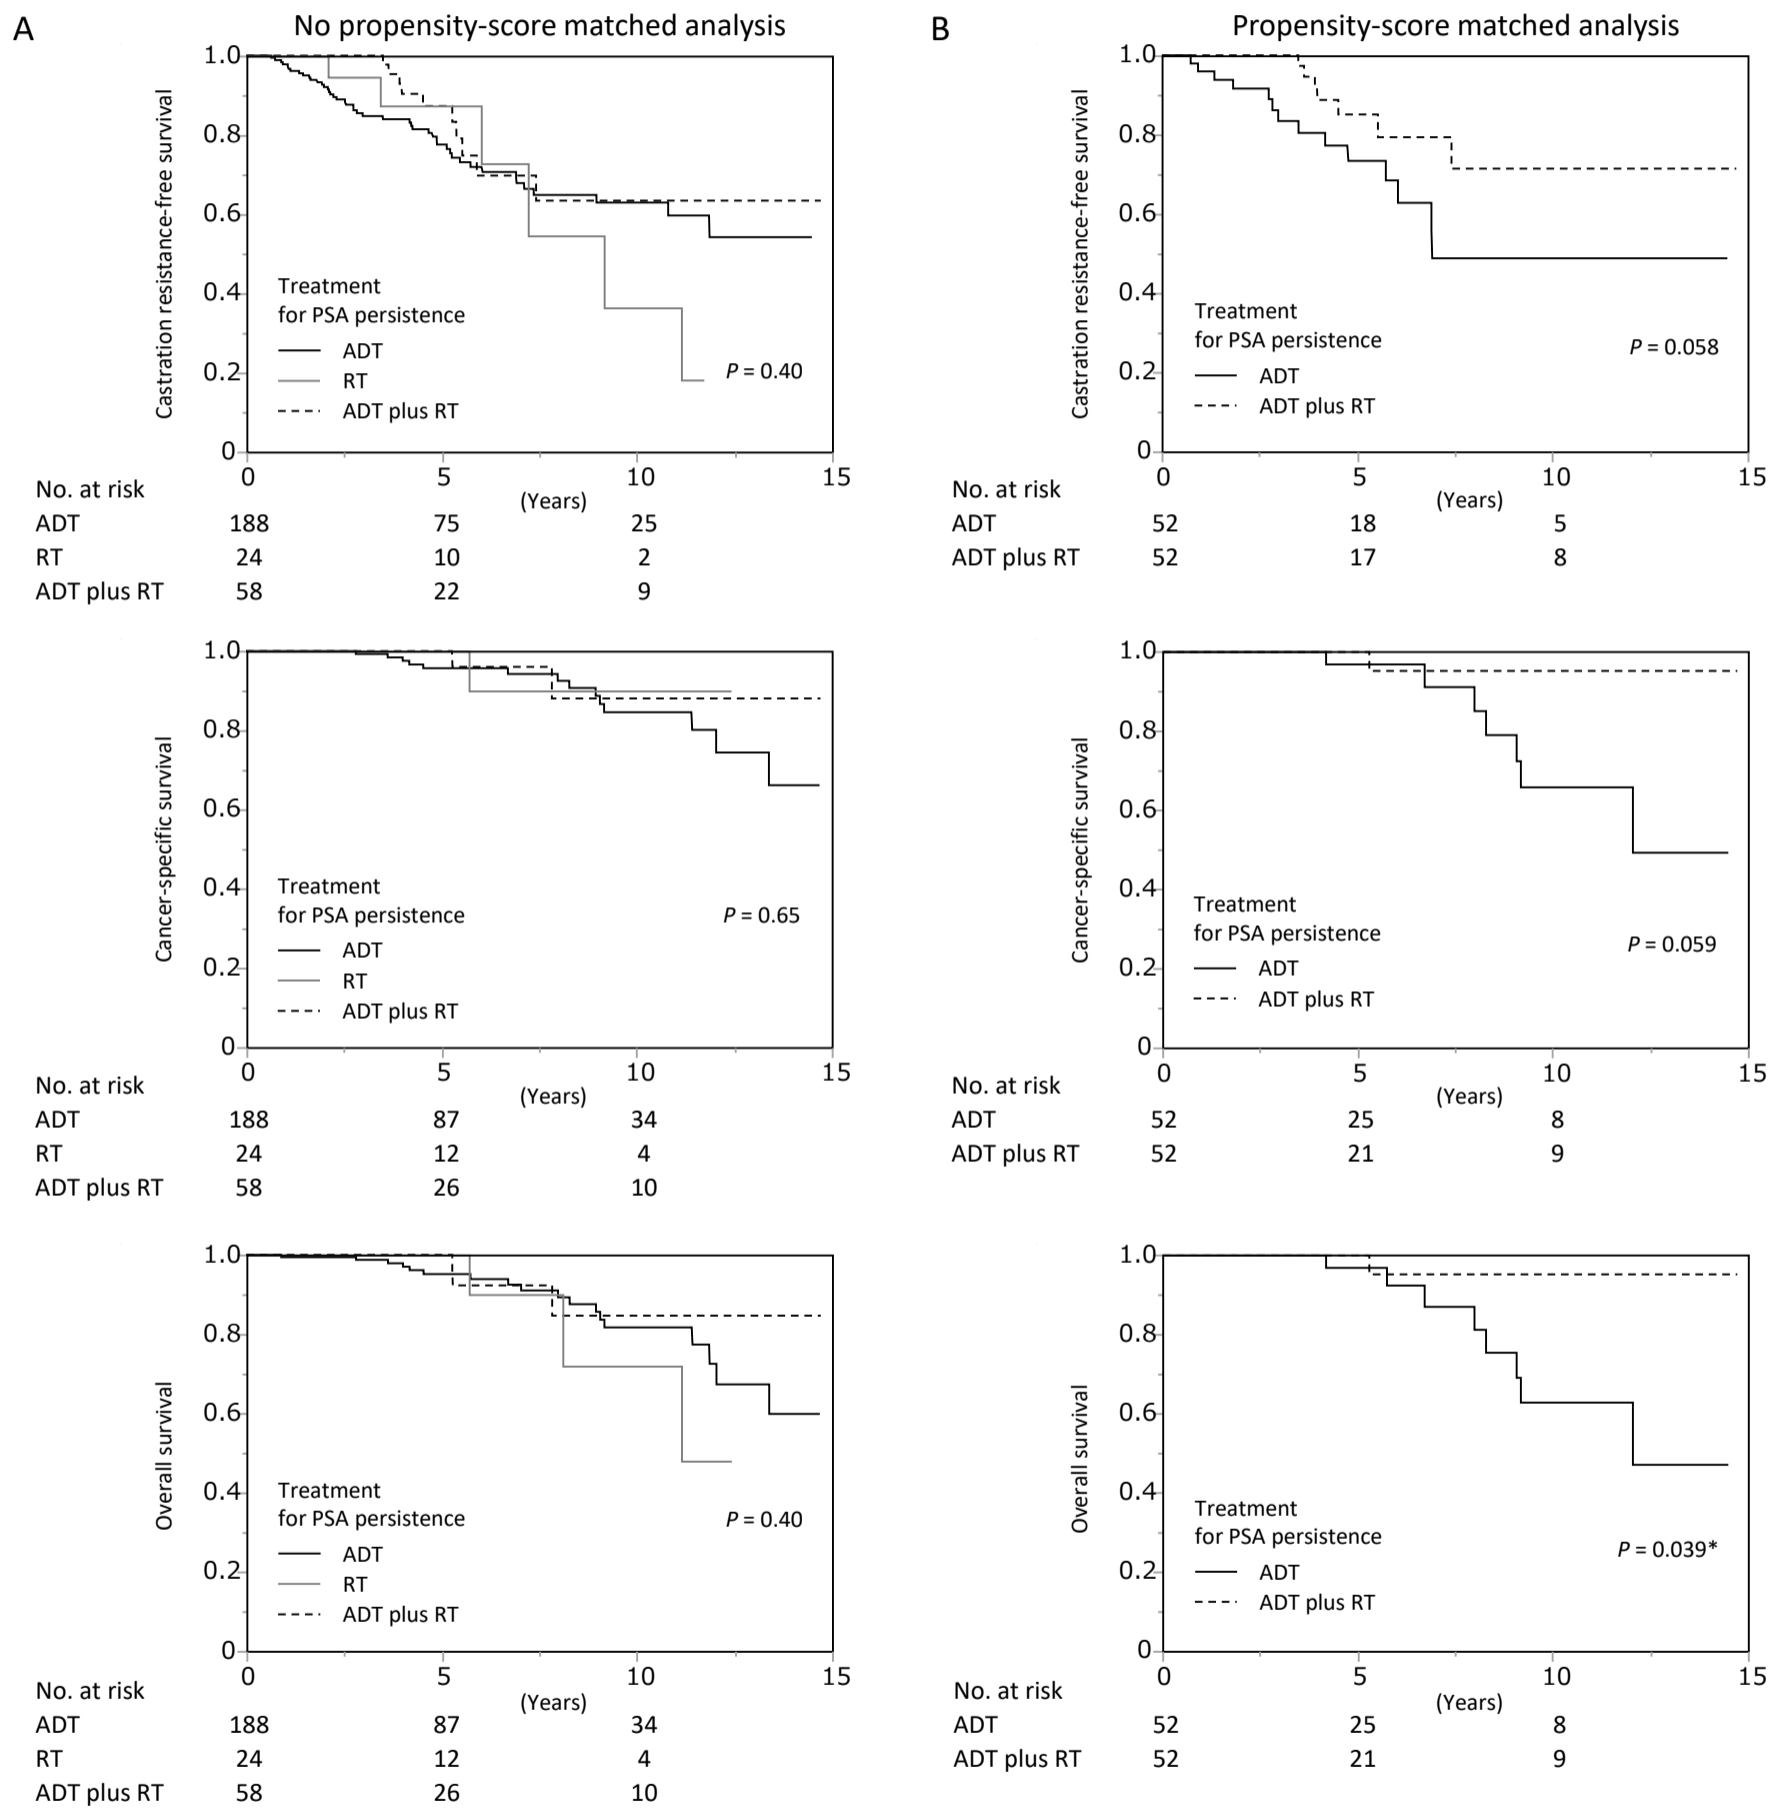

Supplementary Figure 2. Kaplan–Meier analysis of prognosis among patients with prostate-specific antigen (PSA) persistence. (A) Castration resistance-free survival (upper panel), cancer-specific survival (middle panel), and overall survival (lower panel) stratified by treatment for PSA persistence. (B) Castration resistance-free survival (upper panel), cancer-specific survival (middle panel), and overall survival (lower panel) stratified by treatment for PSA persistence after propensity score matching. ADT, androgen-deprivation therapy; RT, radiotherapy.
